# Supplementary material for: Determinants of an autism spectrum disorder diagnosis in childhood and adolescence: Evidence from the UK Millennium Cohort Study
Source: PubMed Central journal article supplement (PMC7645602; doi:10.1177/1362361320913671), 2020-05-05
Supplement: Supplementary_material.pdf [file Supplementary_material.pdf]

## Supplementary Table S1

*Characteristics of the MCS sample by the timing of diagnosis for autism spectrum disorder*

|                                                          | Total MCS sample at age 5 interview (N = 15,431) <sup>a</sup> |      |                                 |      |                                   |      |                                            |      |
|----------------------------------------------------------|---------------------------------------------------------------|------|---------------------------------|------|-----------------------------------|------|--------------------------------------------|------|
|                                                          | ASD (n = 581)                                                 |      |                                 |      |                                   |      | No diagnosis of ASD by age 14 (n = 14,850) |      |
|                                                          | Before school (n = 126)                                       |      | During primary school (n = 300) |      | During secondary school (n = 155) |      |                                            |      |
| n                                                        | %                                                             | n    | %                               | n    | %                                 | n    | %                                          |      |
| Sex of the child                                         |                                                               |      |                                 |      |                                   |      |                                            |      |
| Male                                                     | 104                                                           | 80.6 | 233                             | 76.9 | 111                               | 73.3 | 7,424                                      | 49.9 |
| Female                                                   | 22                                                            | 19.4 | 67                              | 23.1 | 44                                | 26.7 | 7,426                                      | 50.1 |
| Cognitive ability at age 5                               |                                                               |      |                                 |      |                                   |      |                                            |      |
| Within normal range                                      | 63                                                            | 87.5 | 235                             | 86.4 | 136                               | 93.1 | 13,928                                     | 96.3 |
| Below 1 SD                                               | 11                                                            | 12.5 | 41                              | 13.6 | 13                                | 6.9  | 622                                        | 3.8  |
| Parental highest education                               |                                                               |      |                                 |      |                                   |      |                                            |      |
| A-level or above                                         | 63                                                            | 46.0 | 188                             | 63.4 | 80                                | 51.1 | 8,978                                      | 61.7 |
| Below A-level                                            | 63                                                            | 54.0 | 111                             | 36.6 | 75                                | 48.9 | 5,861                                      | 38.3 |
| Low household income                                     |                                                               |      |                                 |      |                                   |      |                                            |      |
| Yes                                                      | 42                                                            | 31.1 | 119                             | 37.3 | 65                                | 45.5 | 4,977                                      | 30.3 |
| No                                                       | 84                                                            | 68.9 | 181                             | 62.7 | 90                                | 54.5 | 9,787                                      | 69.7 |
| Neighbourhood health deprivation                         |                                                               |      |                                 |      |                                   |      |                                            |      |
| Yes                                                      | 12                                                            | 7.5  | 36                              | 10.6 | 27                                | 15.2 | 1,922                                      | 10.7 |
| No                                                       | 114                                                           | 92.5 | 264                             | 89.5 | 128                               | 84.8 | 12,927                                     | 89.3 |
| Parent-reported diagnosis of ADHD by age 14              |                                                               |      |                                 |      |                                   |      |                                            |      |
| Yes                                                      | 41                                                            | 31.8 | 116                             | 37.8 | 39                                | 24.4 | 295                                        | 2.0  |
| No                                                       | 85                                                            | 68.3 | 184                             | 62.2 | 116                               | 75.6 | 14,553                                     | 98.0 |
| Preceding parent-reported diagnosis of ADHD <sup>b</sup> |                                                               |      |                                 |      |                                   |      |                                            |      |
| Yes                                                      | -                                                             | -    | 42                              | 14.7 | 18                                | 12.2 | -                                          | -    |
| No                                                       | -                                                             | -    | 258                             | 85.3 | 137                               | 87.8 | -                                          | -    |

*Note.* Unweighted numbers and weighted percentages are shown. N varies due to missing data. <sup>a</sup>28 children without a valid answer for diagnosis of ASD at all waves are excluded. <sup>b</sup> Defined as parents reporting a diagnosis of ADHD in waves prior to reporting a diagnosis of ASD.

## Supplementary Table S2

*The observed prevalence of parental/teacher concerns over the child's socio-behavioural difficulties*

|                                                                                            | Total MCS sample at age 5 interview (N = 15,431) <sup>a</sup> |      |                                 |      |                                   |      |                                            |      |
|--------------------------------------------------------------------------------------------|---------------------------------------------------------------|------|---------------------------------|------|-----------------------------------|------|--------------------------------------------|------|
|                                                                                            | ASD (n = 581)                                                 |      |                                 |      |                                   |      | No diagnosis of ASD by age 14 (n = 14,850) |      |
|                                                                                            | Before school (n = 126)                                       |      | During primary school (n = 300) |      | During secondary school (n = 155) |      |                                            |      |
|                                                                                            | n                                                             | %    | n                               | %    | n                                 | %    | n                                          | %    |
| Having parental concerns over the child's <i>socio-behavioural</i> difficulties at age 5   |                                                               |      |                                 |      |                                   |      |                                            |      |
| Yes                                                                                        | 103                                                           | 90.9 | 217                             | 71.9 | 88                                | 61.6 | 3,666                                      | 25.4 |
| No                                                                                         | 15                                                            | 9.1  | 77                              | 28.1 | 58                                | 38.4 | 10,566                                     | 74.6 |
| Teacher evaluated social developmental delay at age 5                                      |                                                               |      |                                 |      |                                   |      |                                            |      |
| Yes                                                                                        | 55                                                            | 66.5 | 108                             | 42.0 | 52                                | 51.3 | 2,024                                      | 16.7 |
| No                                                                                         | 27                                                            | 33.5 | 127                             | 58.0 | 61                                | 48.6 | 9,546                                      | 83.4 |
| Having parental concerns over the child's <i>social</i> difficulties at age 5 <sup>b</sup> |                                                               |      |                                 |      |                                   |      |                                            |      |
| Yes                                                                                        | 97                                                            | 84.5 | 155                             | 50.8 | 71                                | 46.2 | 3,698                                      | 24.9 |
| No                                                                                         | 22                                                            | 15.5 | 142                             | 49.2 | 78                                | 53.8 | 10,706                                     | 75.1 |

*Note.* Unweighted numbers and weighted percentages are shown. N varies due to missing data. <sup>a</sup>28 children without a valid answer for diagnosis of ASD at all waves are excluded. <sup>b</sup>Scoring either above 1SD on the peer subscale or below 1SD on the prosocial subscale of the parent-reported Strengths and Difficulties Questionnaire measured at age 5.

### Supplementary Table S3

*Sensitivity analysis for determinants of the timing of diagnosis for autism spectrum disorder*

|                                                                        | Timing of diagnosis for autism spectrum disorder |                                      |
|------------------------------------------------------------------------|--------------------------------------------------|--------------------------------------|
|                                                                        | During primary school <sup>a</sup>               | During secondary school <sup>a</sup> |
| Female sex                                                             | 0.90 (0.47 to 1.73)                              | 1.11 (0.53 to 2.32)                  |
| Cognitive delay at age 5                                               | 1.23 (0.53 to 2.86) <sup>b</sup>                 | 0.53 (0.20 to 1.36) <sup>b</sup>     |
| Low parental education (below A-level)                                 | 0.42 (0.24 to 0.74)                              | 0.66 (0.37 to 1.18)                  |
| Low household income                                                   | 2.21 (1.19 to 4.09)                              | 2.53 (1.24 to 5.19)                  |
| Having parental concerns over the child's social difficulties at age 5 | 0.20 (0.11 to 0.39)                              | 0.17 (0.08 to 0.33)                  |
| Teacher evaluated social developmental delay                           | 0.53 (0.29 to 0.95)                              | 0.75 (0.39 to 1.45)                  |
| Neighbourhood health deprivation                                       | 1.46 (0.75 to 2.84)                              | 1.69 (0.69 to 4.15)                  |

*Note.* Adjusted Relative risk ratios (95% confidence intervals) are reported. <sup>a</sup>The Before school group is taken as reference. <sup>b</sup>Significant difference between During primary school group and During secondary school group. All analyses adjusted for multiple birth indicator.

## Supplementary Table S4

*Sensitivity analysis for determinants of the timing of diagnosis for autism spectrum disorder without children with preceding diagnosis of attention-deficit/hyperactivity disorder (ADHD)*

|                                                                                   | Timing of diagnosis for autism spectrum disorder |                                      |
|-----------------------------------------------------------------------------------|--------------------------------------------------|--------------------------------------|
|                                                                                   | During primary school <sup>a</sup>               | During secondary school <sup>a</sup> |
| Female sex                                                                        | 1.12 (0.57 to 2.17)                              | 1.33 (0.66 to 2.71)                  |
| Cognitive delay                                                                   | 1.10 (0.49 to 2.48) <sup>b</sup>                 | 0.43 (0.15 to 1.18) <sup>b</sup>     |
| Low parental education (below A-level)                                            | 0.42 (0.24 to 0.74)                              | 0.61 (0.34 to 1.09)                  |
| Low household income                                                              | 1.76 (0.93 to 3.31)                              | 2.19 (1.07 to 4.46)                  |
| Having parental concerns over the child's socio-behavioural difficulties at age 5 | 0.28 (0.12 to 0.61)                              | 0.17 (0.08 to 0.39)                  |
| Teacher evaluated social developmental delay                                      | 0.47 (0.26 to 0.85)                              | 0.70 (0.36 to 1.37)                  |
| Neighbourhood health deprivation                                                  | 1.77 (0.86 to 3.64)                              | 1.93 (0.66 to 5.69)                  |

*Note.* Adjusted Relative risk ratios (95% confidence intervals) are reported. <sup>a</sup>The Before school group is taken as reference. <sup>b</sup>Significant difference between During primary school group and During secondary school group. All analyses adjusted for multiple birth indicator.

## Supplementary Table S5

*Sensitivity analysis for determinants of the timing of diagnosis for autism spectrum disorder without 15 children who lost their parent-reported diagnosis at age 7*

|                                                                                   | Timing of diagnosis for autism spectrum disorder |                                      |
|-----------------------------------------------------------------------------------|--------------------------------------------------|--------------------------------------|
|                                                                                   | During primary school <sup>a</sup>               | During secondary school <sup>a</sup> |
| Female sex                                                                        | 0.98 (0.48 to 2.01)                              | 1.19 (0.56 to 2.50)                  |
| Cognitive delay                                                                   | 1.10 (0.48 to 2.53) <sup>b</sup>                 | 0.48 (0.18 to 1.31) <sup>b</sup>     |
| Low parental education (below A-level)                                            | 0.43 (0.24 to 0.79)                              | 0.69 (0.39 to 1.25)                  |
| Low household income                                                              | 2.24 (1.16 to 4.35)                              | 2.56 (1.19 to 5.52)                  |
| Having parental concerns over the child's socio-behavioural difficulties at age 5 | 0.19 (0.07 to 0.54) <sup>b</sup>                 | 0.11 (0.04 to 0.33) <sup>b</sup>     |
| Teacher evaluated social developmental delay                                      | 0.40 (0.22 to 0.75)                              | 0.60 (0.30 to 1.17)                  |
| Neighbourhood health deprivation                                                  | 1.63 (0.77 to 3.41)                              | 1.88 (0.64 to 5.54)                  |

*Note.* Adjusted Relative risk ratios (95% confidence intervals) are reported. <sup>a</sup>The Before school group is taken as reference. <sup>b</sup>Significant difference between During primary school group and During secondary school group. All analyses adjusted for multiple birth indicator.
